# Supplementary material for: Convergent patterns in the evolution of mealybug symbioses involving different intrabacterial symbionts
Source: PubMed Central journal article supplement — ISME J. 2016 Dec 16;11(3):715–26. doi: 10.1038/ismej.2016.148 (PMC5322300; doi:10.1038/ismej.2016.148), 2016-12-16
Supplement: ismej2016148x1.pdf [file ismej2016148x1.pdf]

# **Convergent patterns in the evolution of mealybug symbioses involving different intrabacterial symbionts**

Gitta Szabó, Frederik Schulz, Elena R. Toenshoff, Jean-Marie Volland, Omri M. Finkel,  
Shimshon Belkin, Matthias Horn

## **Supplementary Information**

## Supplementary Materials and Methods

### Microscopy

Mealybugs were fixed in 4% paraformaldehyde solution for 4 hours at 4°C, washed twice in 1:1 solution of PBS and ethanol, and stored in this solution at 4°C on the day of sampling for subsequent fluorescence *in situ* hybridization (FISH). FISH was performed on dissected specimens as described earlier (Toenshoff *et al.*, 2012). We employed a general bacterial probe (EUB-338I: 5'-GCT GCC TCC CGT AGG AGT-3') (Amann *et al.*, 1990), a general gammaproteobacterial probe (Gam42a: 5'-GCC TTC CCA CAT CGT TT-3') and an unlabeled competitor probe (Bet42a: 5'-GCC TTC CCA CTT CGT TT-3') (Manz *et al.*, 1992) together with a probe specific to the 16S rRNA of the gammaproteobacterial symbiont of *T. manniapara* (Trabutinella-300: 5'-CAG TGT GGC TGT TTA TCC-3') using 20v/v% formamide in the hybridization buffer. Samples were hybridized for at least 1.5 hours and were analyzed on a Leica Sp8 confocal laser-scanning microscope.

Frozen egg sacs of *T. mannipara* stored at -80°C were dissected and individual insects were fixed under vacuum in 2.5% glutaraldehyde and 2% paraformaldehyde in 0.1M phosphate buffer at pH 7.2 for two days at 4°C. The mealybugs were cut open on the sides to improve the penetration of the fixative. Samples were then washed in the buffer under vacuum for 4h and post-fixed in 2% osmium tetroxide in 0.1M phosphate buffer. They were subsequently dehydrated in an ethanol series, substituted in acetone and embedded in Agar Low Viscosity Resin®. Polymerization was performed at 60°C for two days. Semi-thin sections (0.5µm) were cut on a Leica® EM UC7, mounted on slides and stained

with a solution of 0.25% azure II, 0.25% methylene blue, 0.25% toluidine blue in 0.25% sodium borate. The slides were observed on a Zeiss® Axio plan-2 light microscope. For ultrastructure observation ultrathin sections (70 nm) were stained with 0.5% uranyl acetate and 3% lead citrate prior observations with a Zeiss® Libra 120 transmission electron microscope.

### **Genome annotation pipeline**

The following steps were performed in the ConsPred genome annotation pipeline (Weinmaier *et al.*, unpublished; available at <https://sourceforge.net/p/conspred/>). Coding sequences (CDSs) were predicted based on intrinsic signals by Glimmer (Salzberg *et al.*, 1998), GeneMark (Lukashin & Borodovsky, 1998), Prodigal (Hyatt *et al.*, 2010) and Critica (Badger & Olsen, 1999), as well as based on sequence homology using blastx searches against the non-redundant protein database (nr) of the National Center for Biotechnology Information (NCBI). RNAmmer (Lagesen *et al.*, 2007), tRNA-scan SE (Lowe & Eddy, 1997), and Infernal (Nawrocki & Eddy, 2013) together with the Rfam database (Griffiths-Jones *et al.*, 2003) were applied to identify ribosomal RNAs, tRNAs and non-coding RNAs. CRISPR repeats were inferred by PILER-CR (Edgar, 2007). InterProScan annotated conserved domains in the consensus CDSs (Zdobnov & Apweiler, 2001). Functional assignment was according to the best blastp hits against the UniProt Swiss-Prot and TrEMBL databases (Bairoch *et al.*, 2005). Pathways and representation of main functional categories were predicted by sequence homology searches against the KEGG (Kanehisa & Goto, 2000) and eggNOG (Jensen *et al.*, 2008) databases, respectively.

## References

- Amann RI, Binder BJ, Olson RJ, Chisholm SW, Devereux R, Stahl DA. (1990). Combination of 16S rRNA-targeted oligonucleotide probes with flow cytometry for analyzing mixed microbial populations. *Appl Environ Microbiol* 56: 1919–1925.
- Badger JH, Olsen GJ. (1999). CRITICA: coding region identification tool invoking comparative analysis. *Mol Biol Evol* 16: 512–524.
- Bairoch A, Apweiler R, Wu CH, Barker WC, Boeckmann B, Ferro S, *et al.* (2005). The universal protein resource (UniProt). *Nucleic Acids Res* 33: D154–D159.
- Edgar RC. (2007). PILER-CR: fast and accurate identification of CRISPR repeats. *BMC Bioinformatics* 8: 18.
- Griffiths-Jones S, Bateman A, Marshall M, Khanna A, Eddy SR. (2003). Rfam: an RNA family database. *Nucleic Acids Res* 31: 439–441.
- Hyatt D, Chen G-L, LoCascio PF, Land ML, Larimer FW, Hauser LJ. (2010). Prodigal: prokaryotic gene recognition and translation initiation site identification. *BMC Bioinformatics* 11: 119.
- Jensen LJ, Julien P, Kuhn M, Mering C von, Muller J, Doerks T, *et al.* (2008). eggNOG: automated construction and annotation of orthologous groups of genes. *Nucleic Acids Res* 36: D250–D254.
- Kanehisa M, Goto S. (2000). KEGG: Kyoto Encyclopedia of Genes and Genomes. *Nucleic Acids Res* 28: 27–30.
- Lagesen K, Hallin P, Rødland EA, Stærfeldt H-H, Rognes T, Ussery DW. (2007). RNAmmer: consistent and rapid annotation of ribosomal RNA genes. *Nucleic Acids Res* 35: 3100–3108.
- Lowe TM, Eddy SR. (1997). tRNAscan-SE: a program for improved detection of transfer rna genes in genomic sequence. *Nucleic Acids Res* 25: 0955–0964.
- Lukashin AV, Borodovsky M. (1998). GeneMark.hmm: new solutions for gene finding. *Nucleic Acids Res* 26: 1107–1115.

- Manz W, Amann R, Ludwig W, Wagner M, Schleifer K-H. (1992). Phylogenetic oligodeoxynucleotide probes for the major subclasses of Proteobacteria: Problems and Solutions. *Syst Appl Microbiol* 15: 593–600.
- Nawrocki EP, Eddy SR. (2013). Infernal 1.1: 100-fold faster RNA homology searches. *Bioinforma Oxf Engl* 29: 2933–2935.
- Salzberg SL, Delcher AL, Kasif S, White O. (1998). Microbial gene identification using interpolated Markov models. *Nucleic Acids Res* 26: 544–548.
- Toenshoff ER, Penz T, Narzt T, Collingro A, Schmitz-Esser S, Pfeiffer S, *et al.* (2012). Bacteriocyte-associated gammaproteobacterial symbionts of the *Adelges nordmannianae/piceae* complex (Hemiptera: Adelgidae). *ISME J* 6: 384–396.
- Zdobnov EM, Apweiler R. (2001). InterProScan – an integration platform for the signature-recognition methods in InterPro. *Bioinformatics* 17: 847–848.

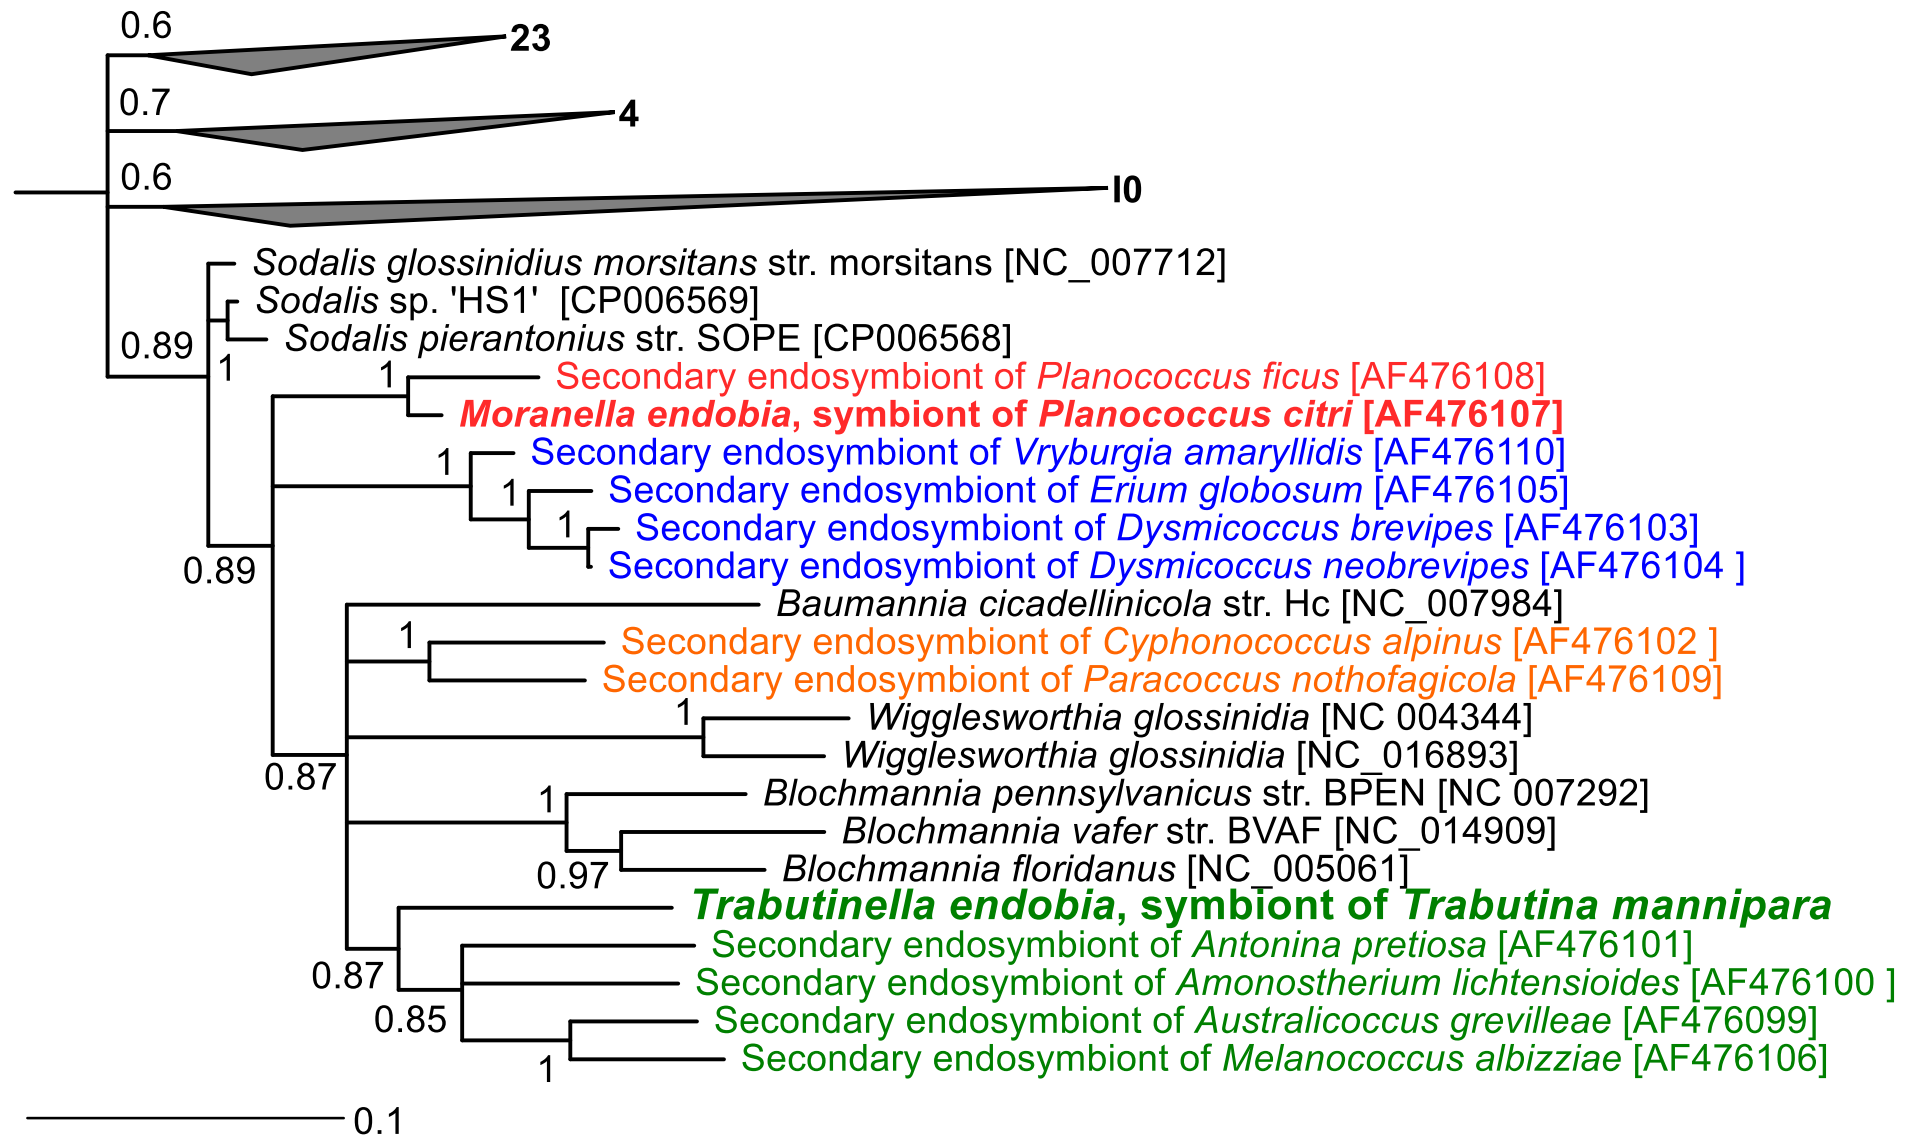

**Figure S1.** MrBayes tree based on 16S rRNA sequences showing the relation of ‘*Candidatus Trabutinella endobia*’ to other symbionts of mealybugs. *Trabutinella* groups with secondary symbionts of other mealybugs within the tribe Trabutinini. Selected members of non-enterobacterial *Gammaproteobacteria* were used as outgroups (NC\_000907, NC\_003902, AB194327, NC\_002516, NC\_002505).

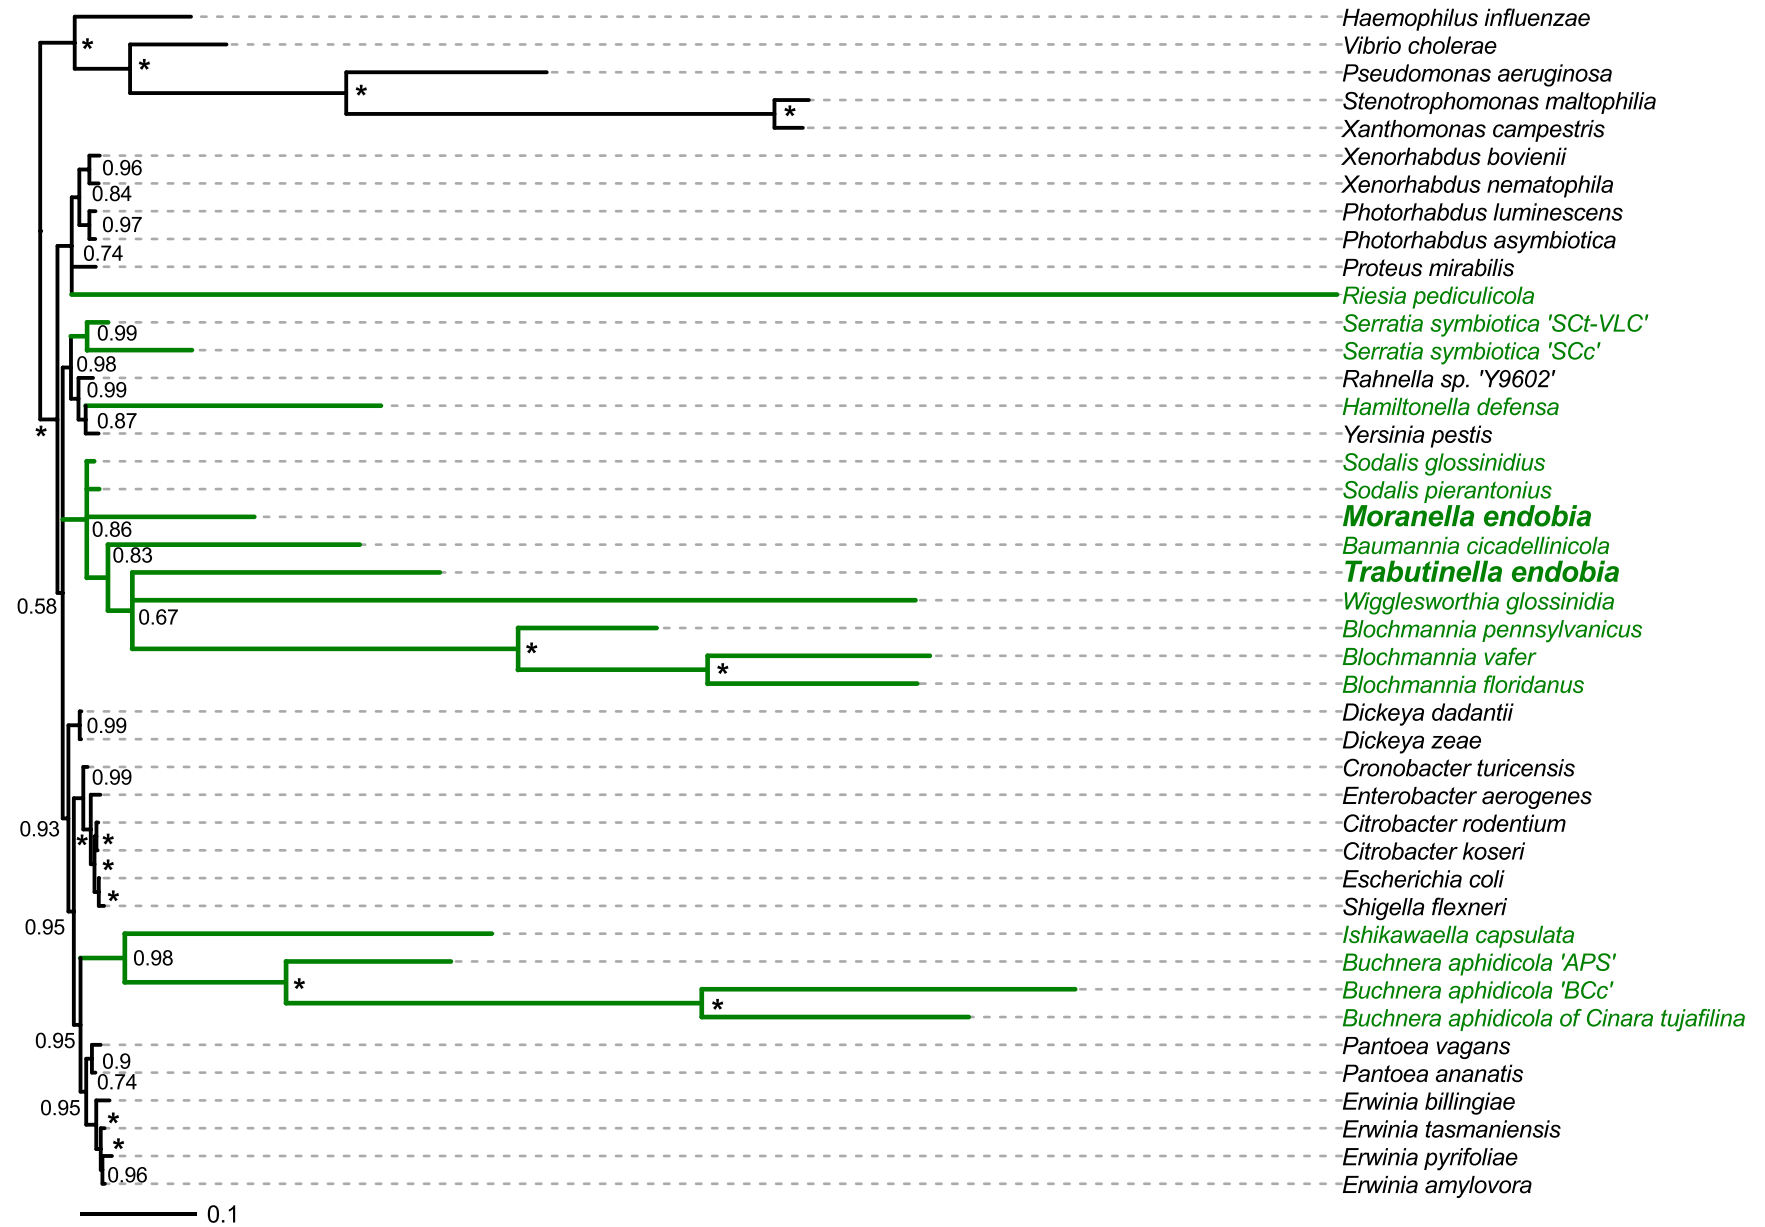

**Figure S2.** Phylobayes tree showing the relation of '*Candidatus Trabutinnella endobia*' to free-living bacteria and other insect symbionts. Insect symbiont lineages are colored in green. The analysis is based on a concatenated set of 34 ribosomal proteins. Posterior probabilities are shown on the internal nodes; asterisks imply posterior probabilities equal to 1. Nodes with a support of 0.5 or below are collapsed.

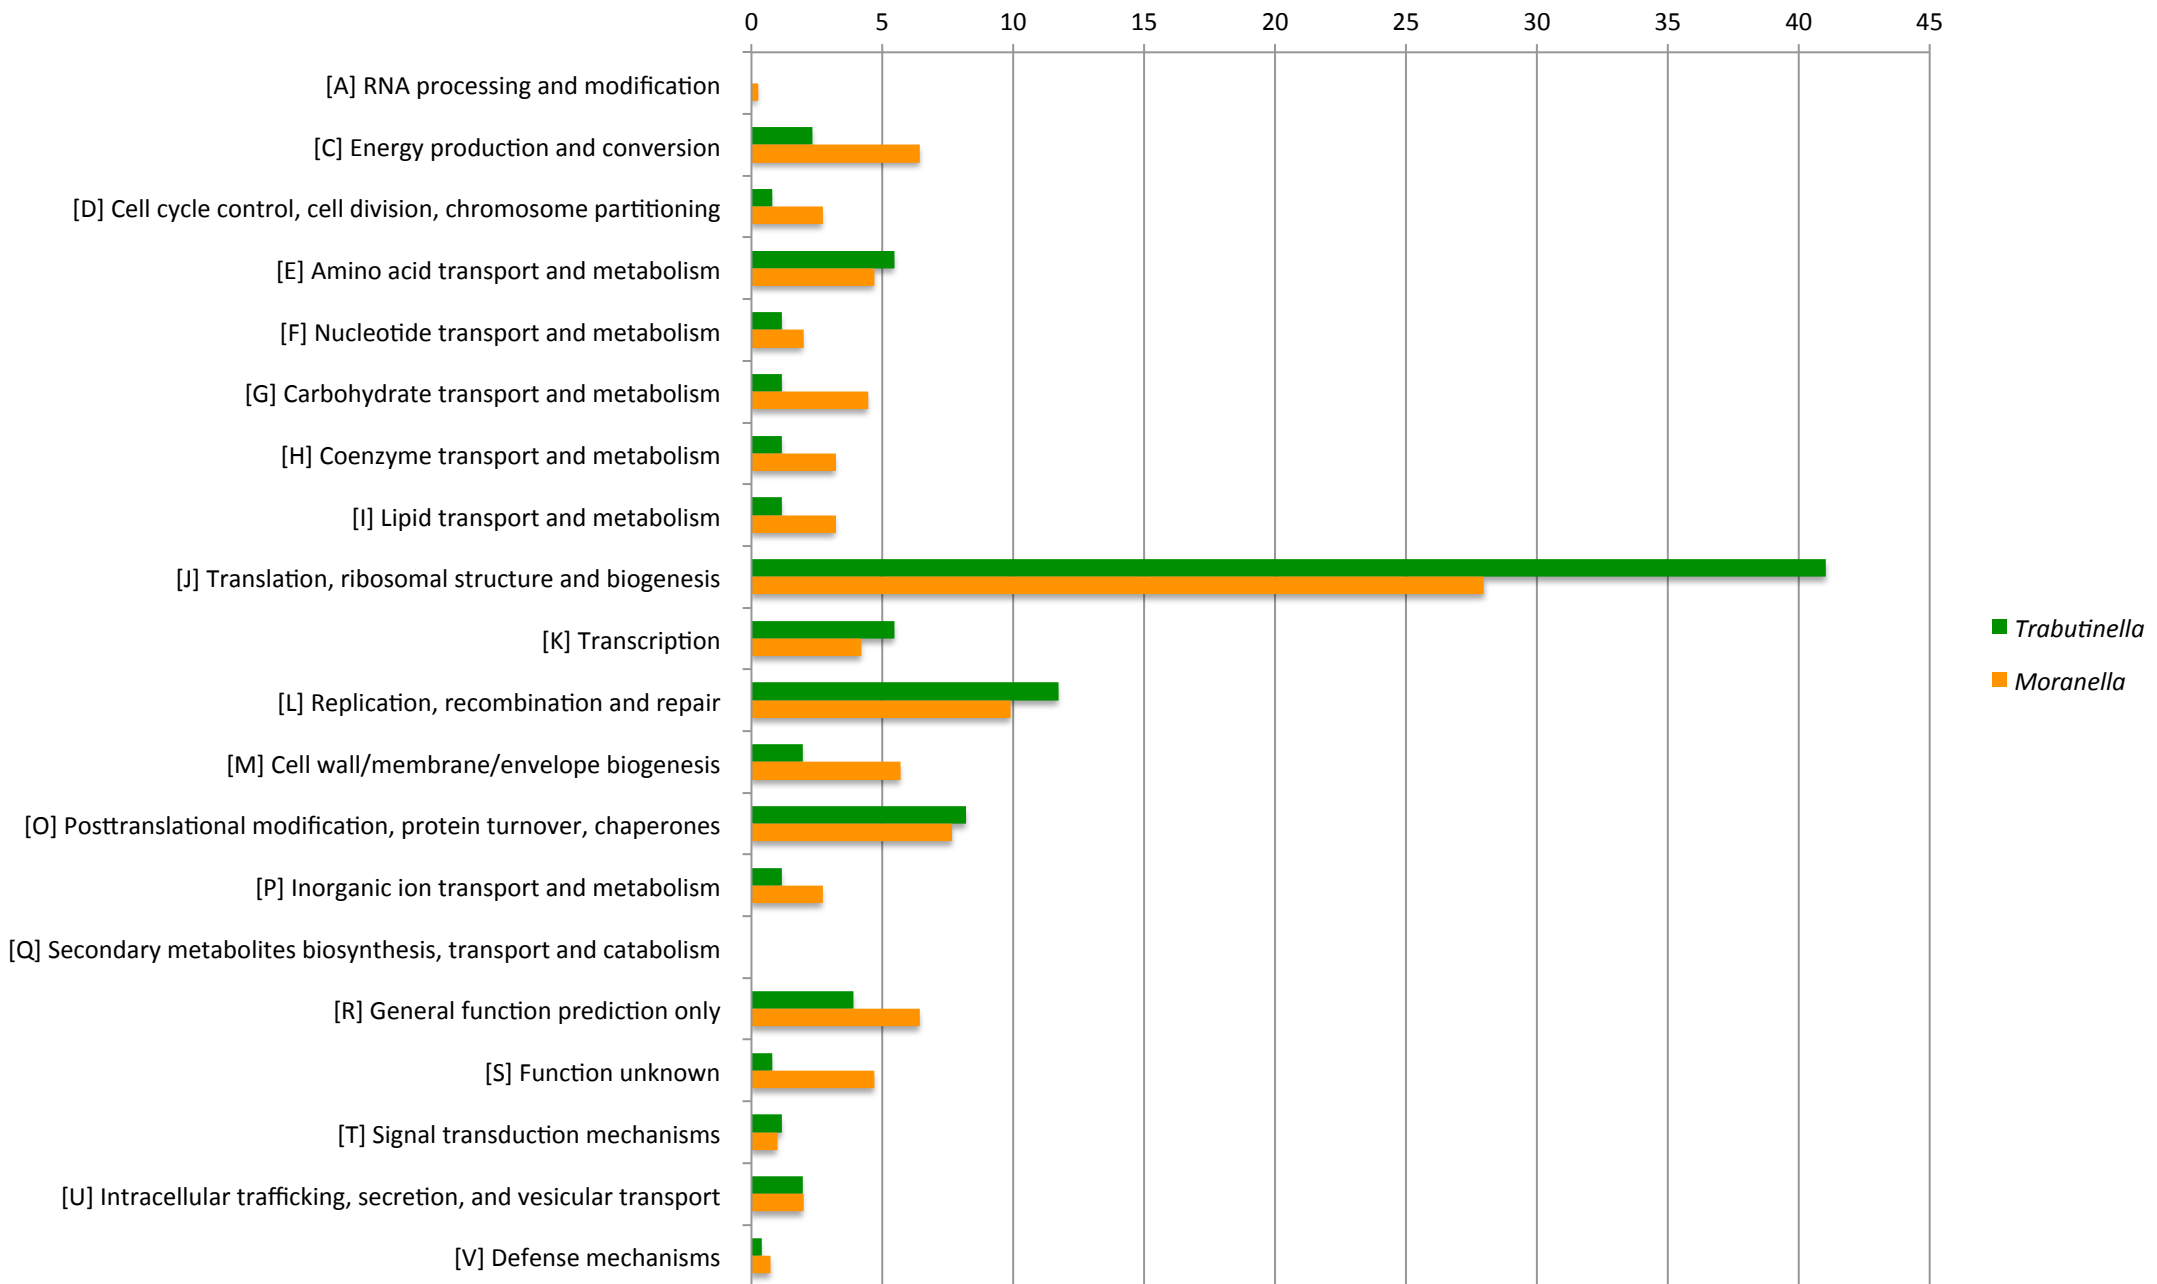

**Figure S3.** Percental distribution of genes among main functional categories according to the EggNOG classification in *Trabutinnella* versus *Moranella*



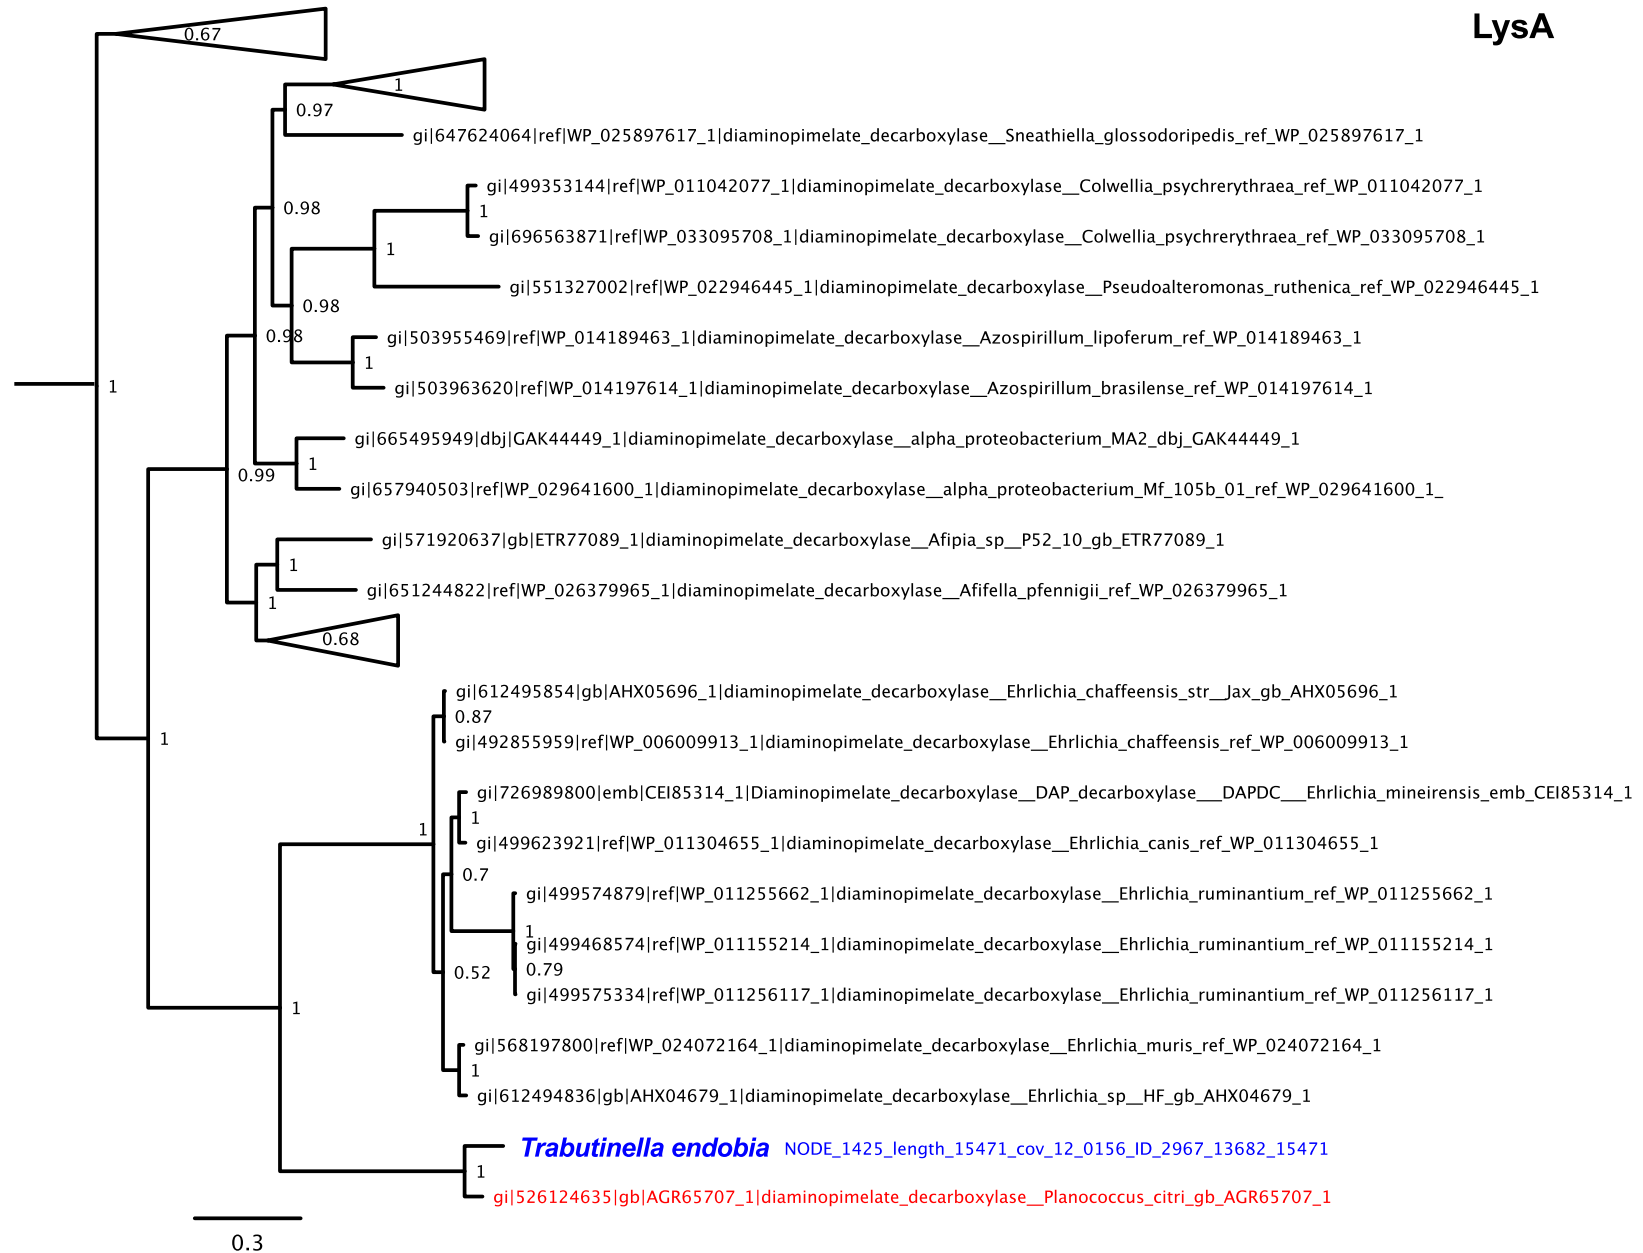

**Figure S4 (A-I)** MrBayes trees showing the phylogenetic relationships of the products of *lysA*, *dapF*, *cysK*, *ribA*, *ribD*, *bioA*, *bioB*, *bioD* and *tmsI*, horizontally acquired genes in the genome of *Trabutina mannipara*.

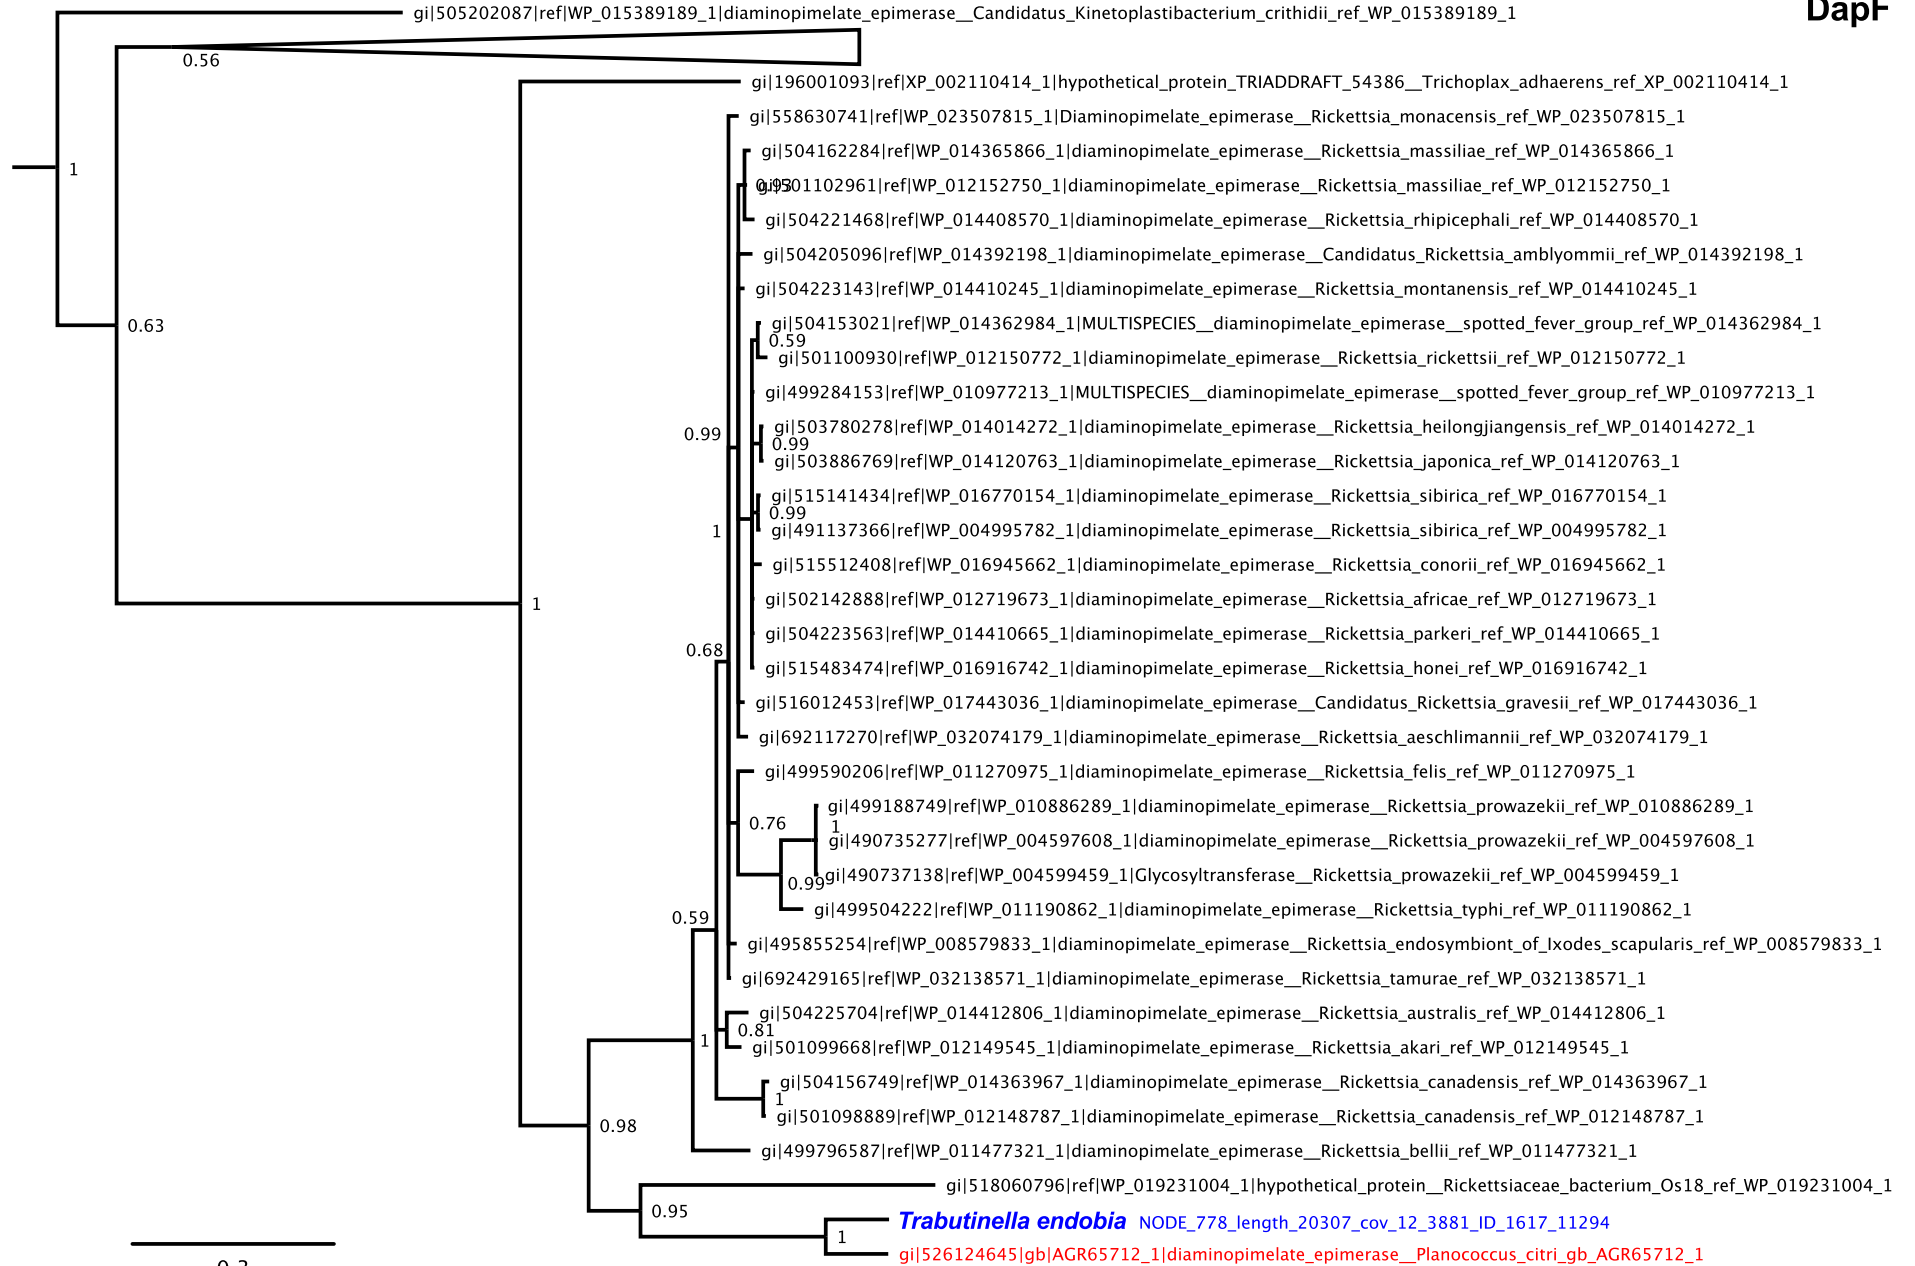

Figure S4B

# CysK

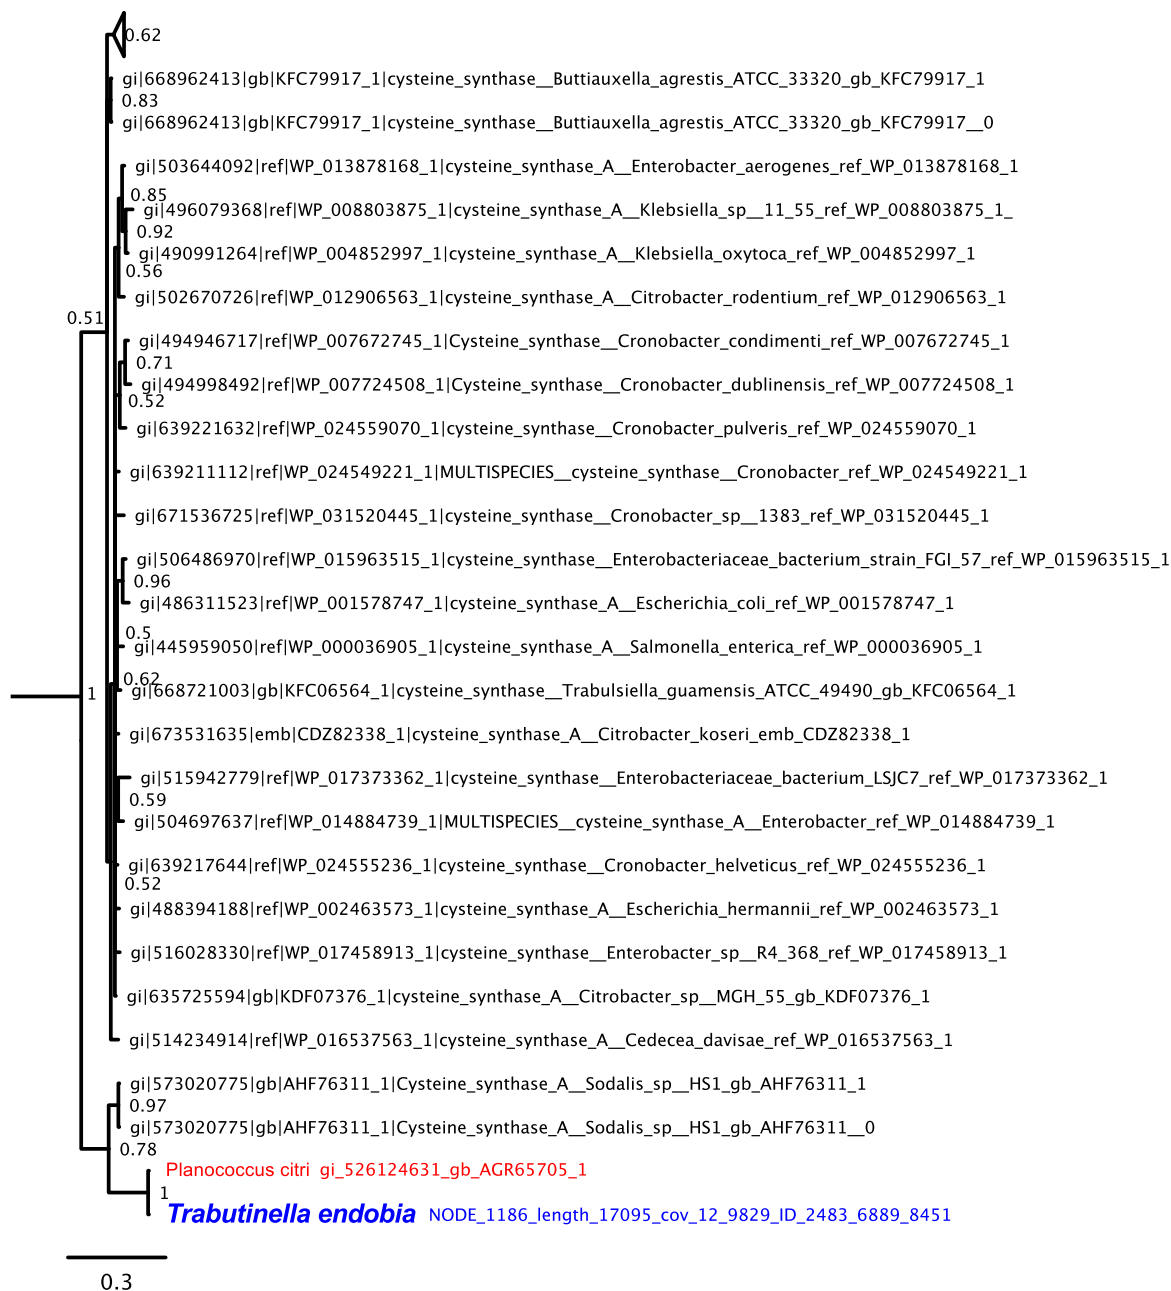

Figure S4C

RibA

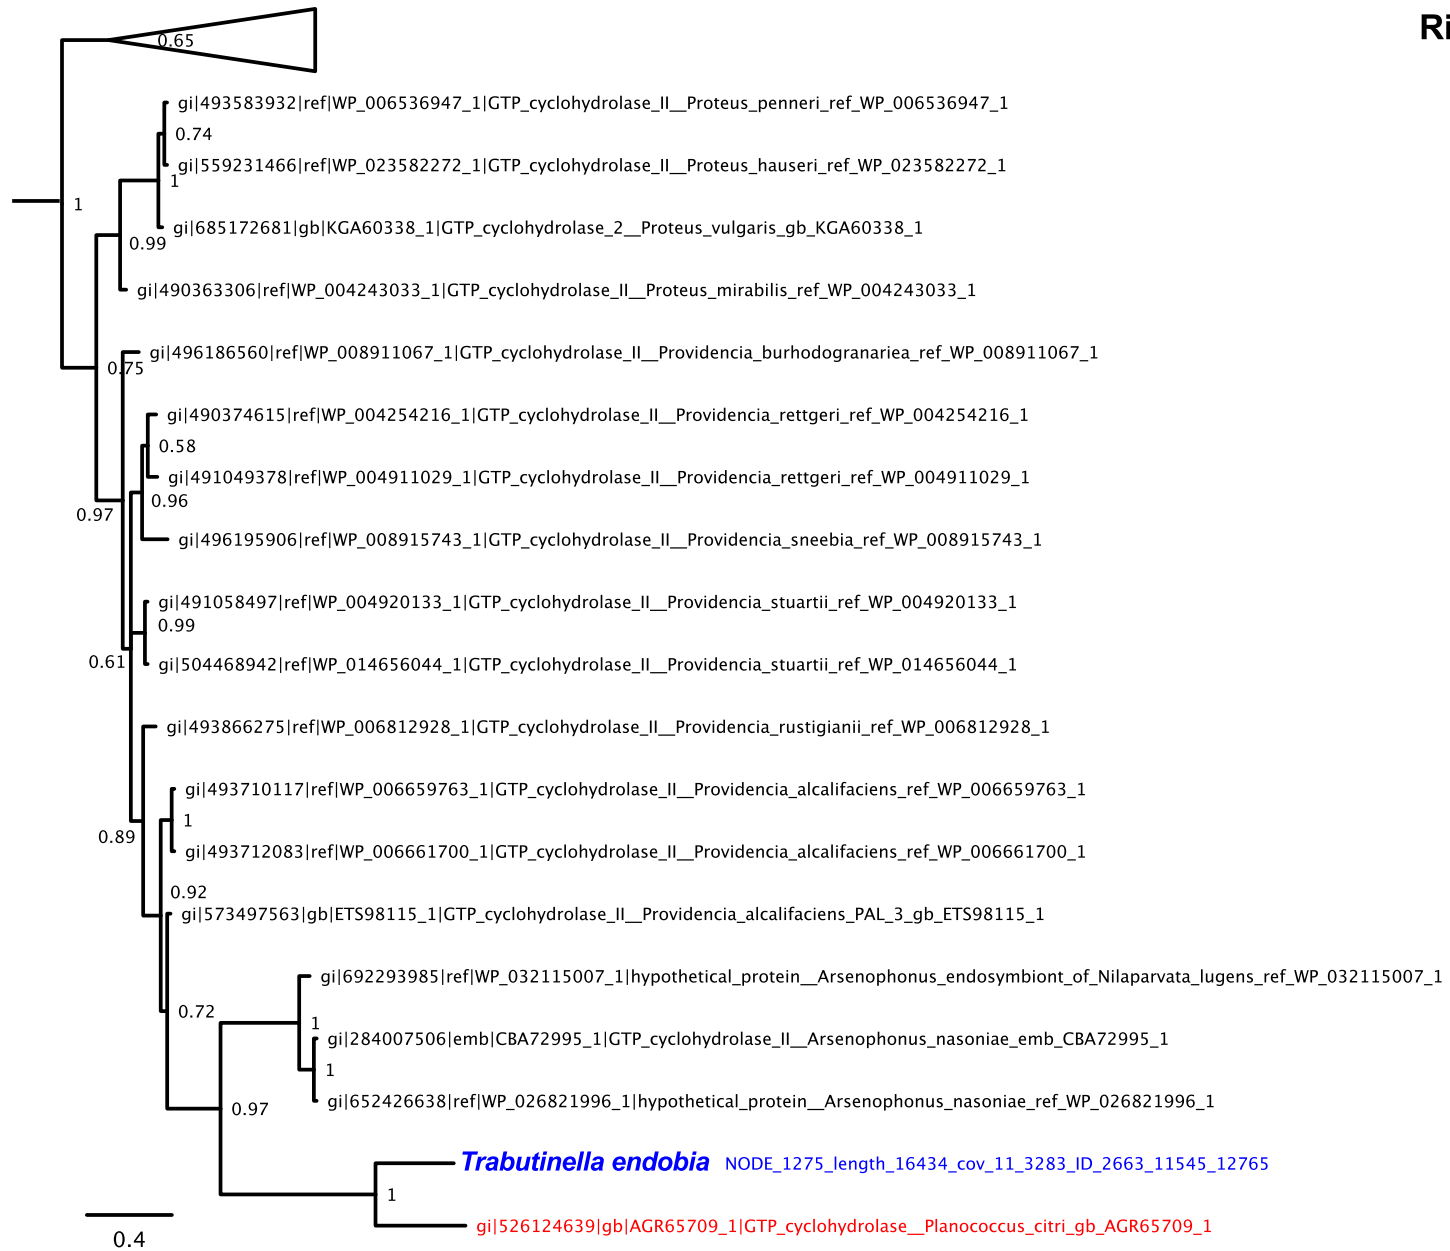

Figure S4D

# RibD

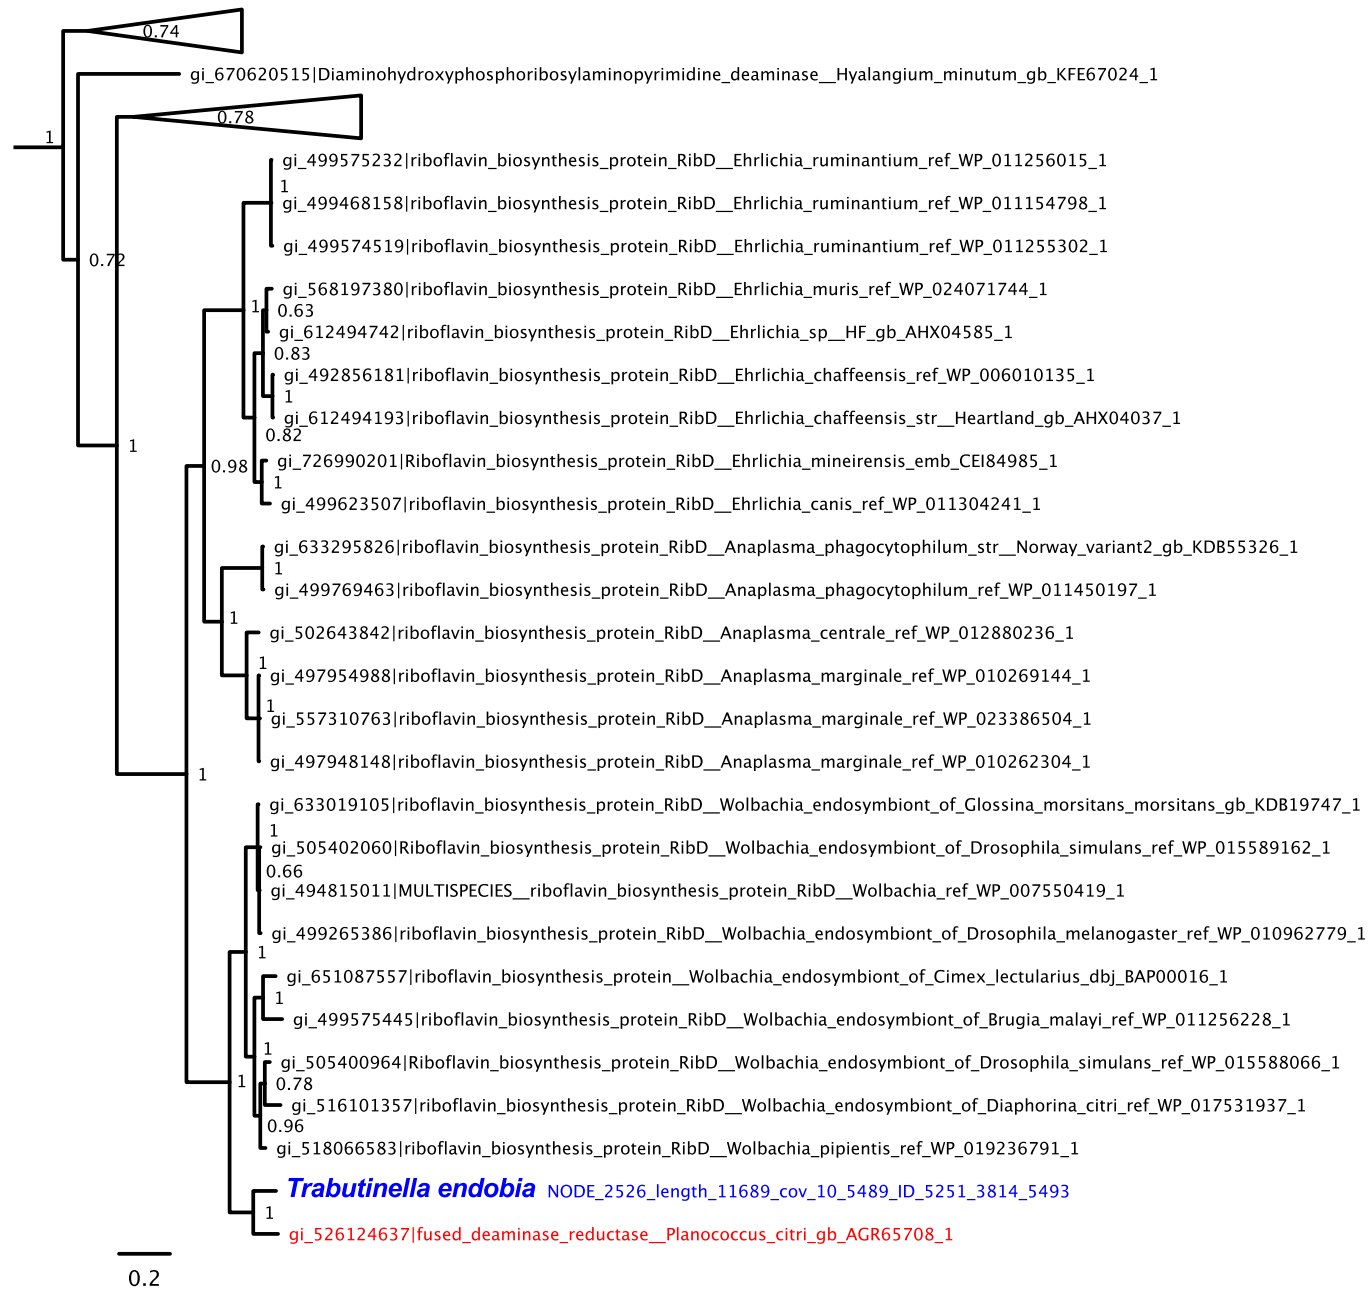

Figure S4E

# BioA

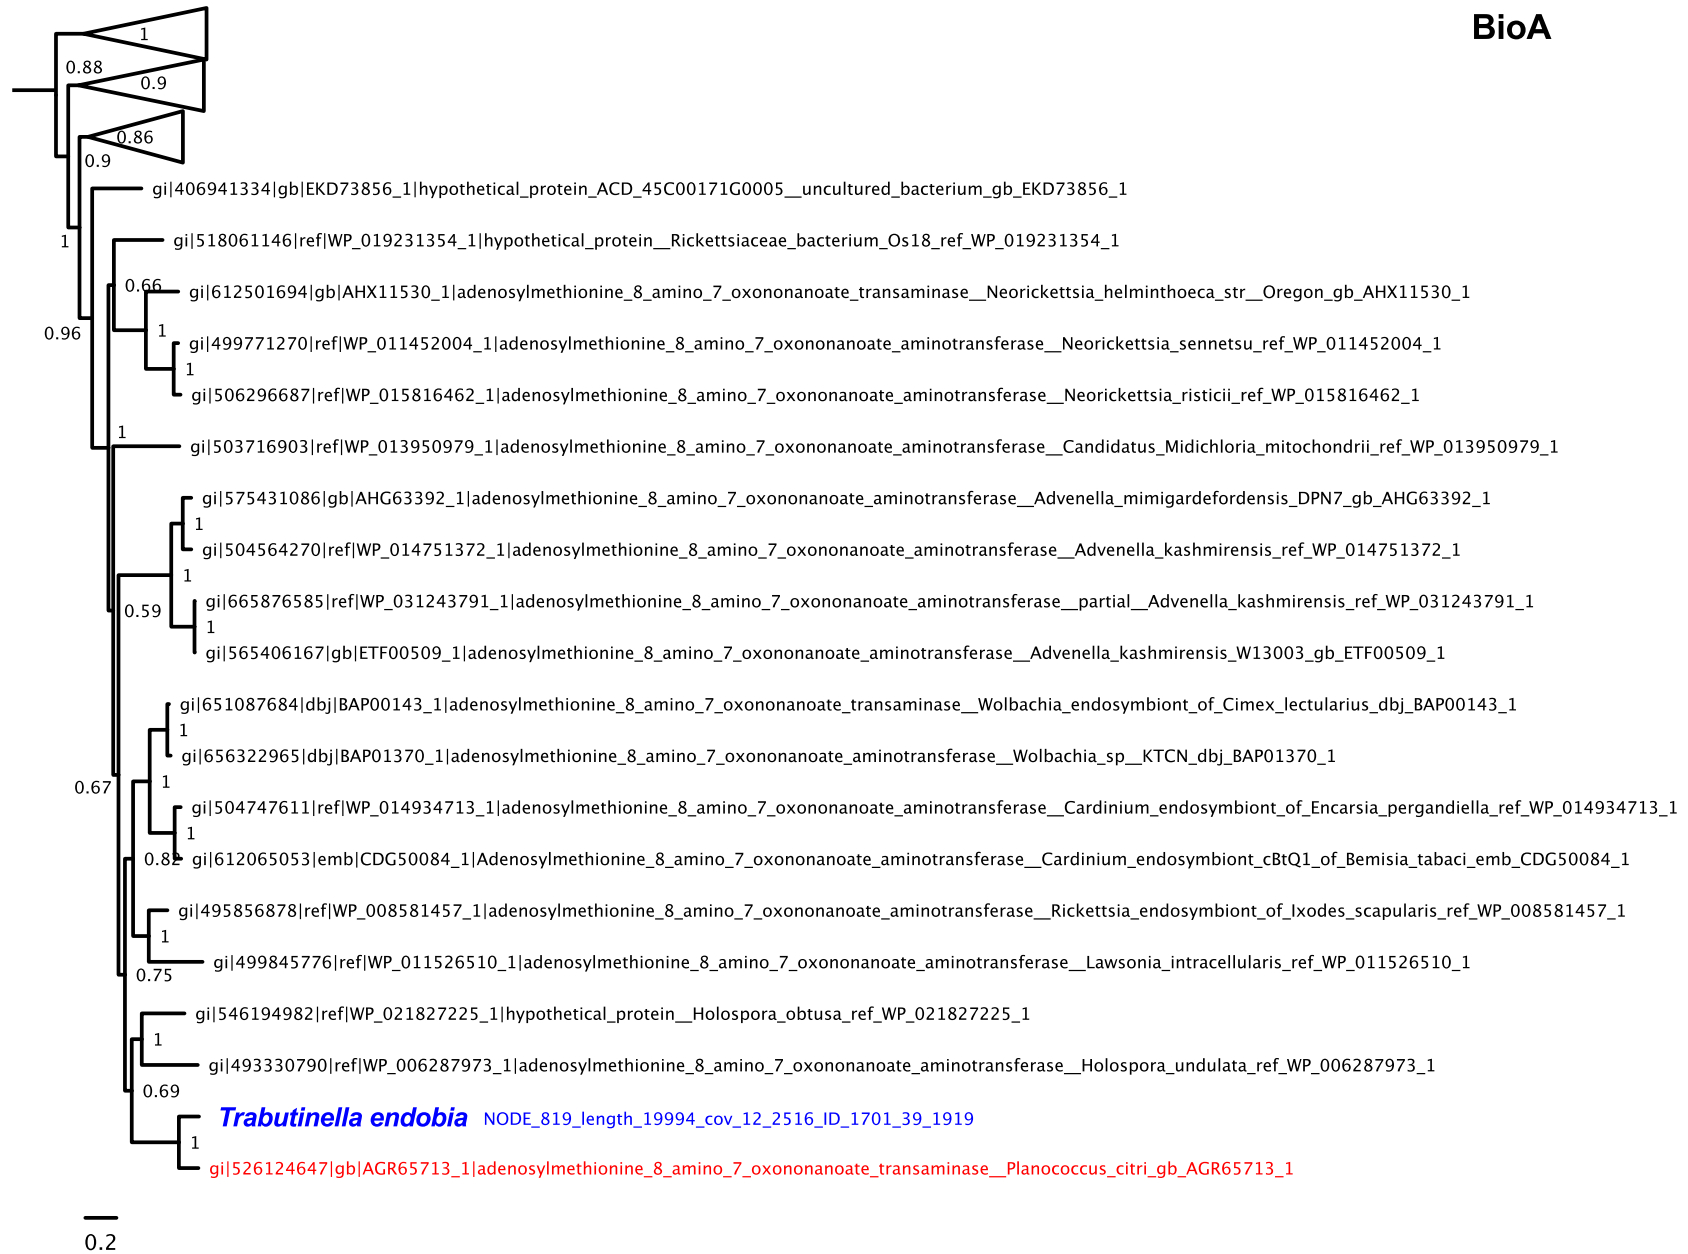

Figure S4F

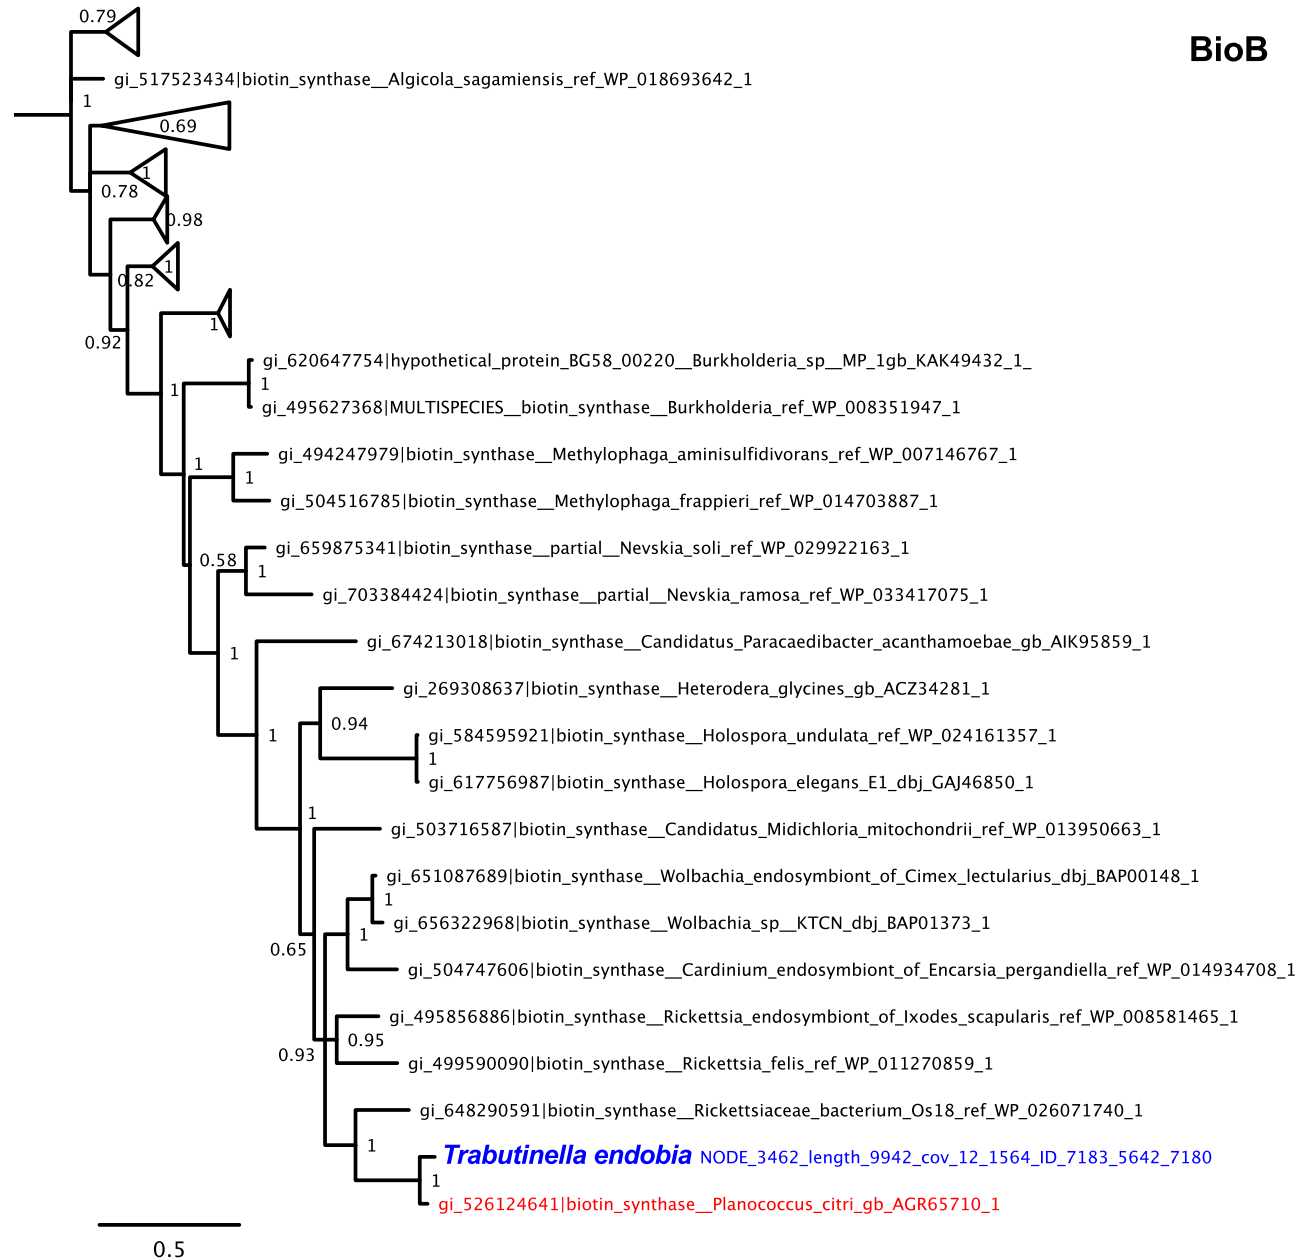

**Figure S4G**

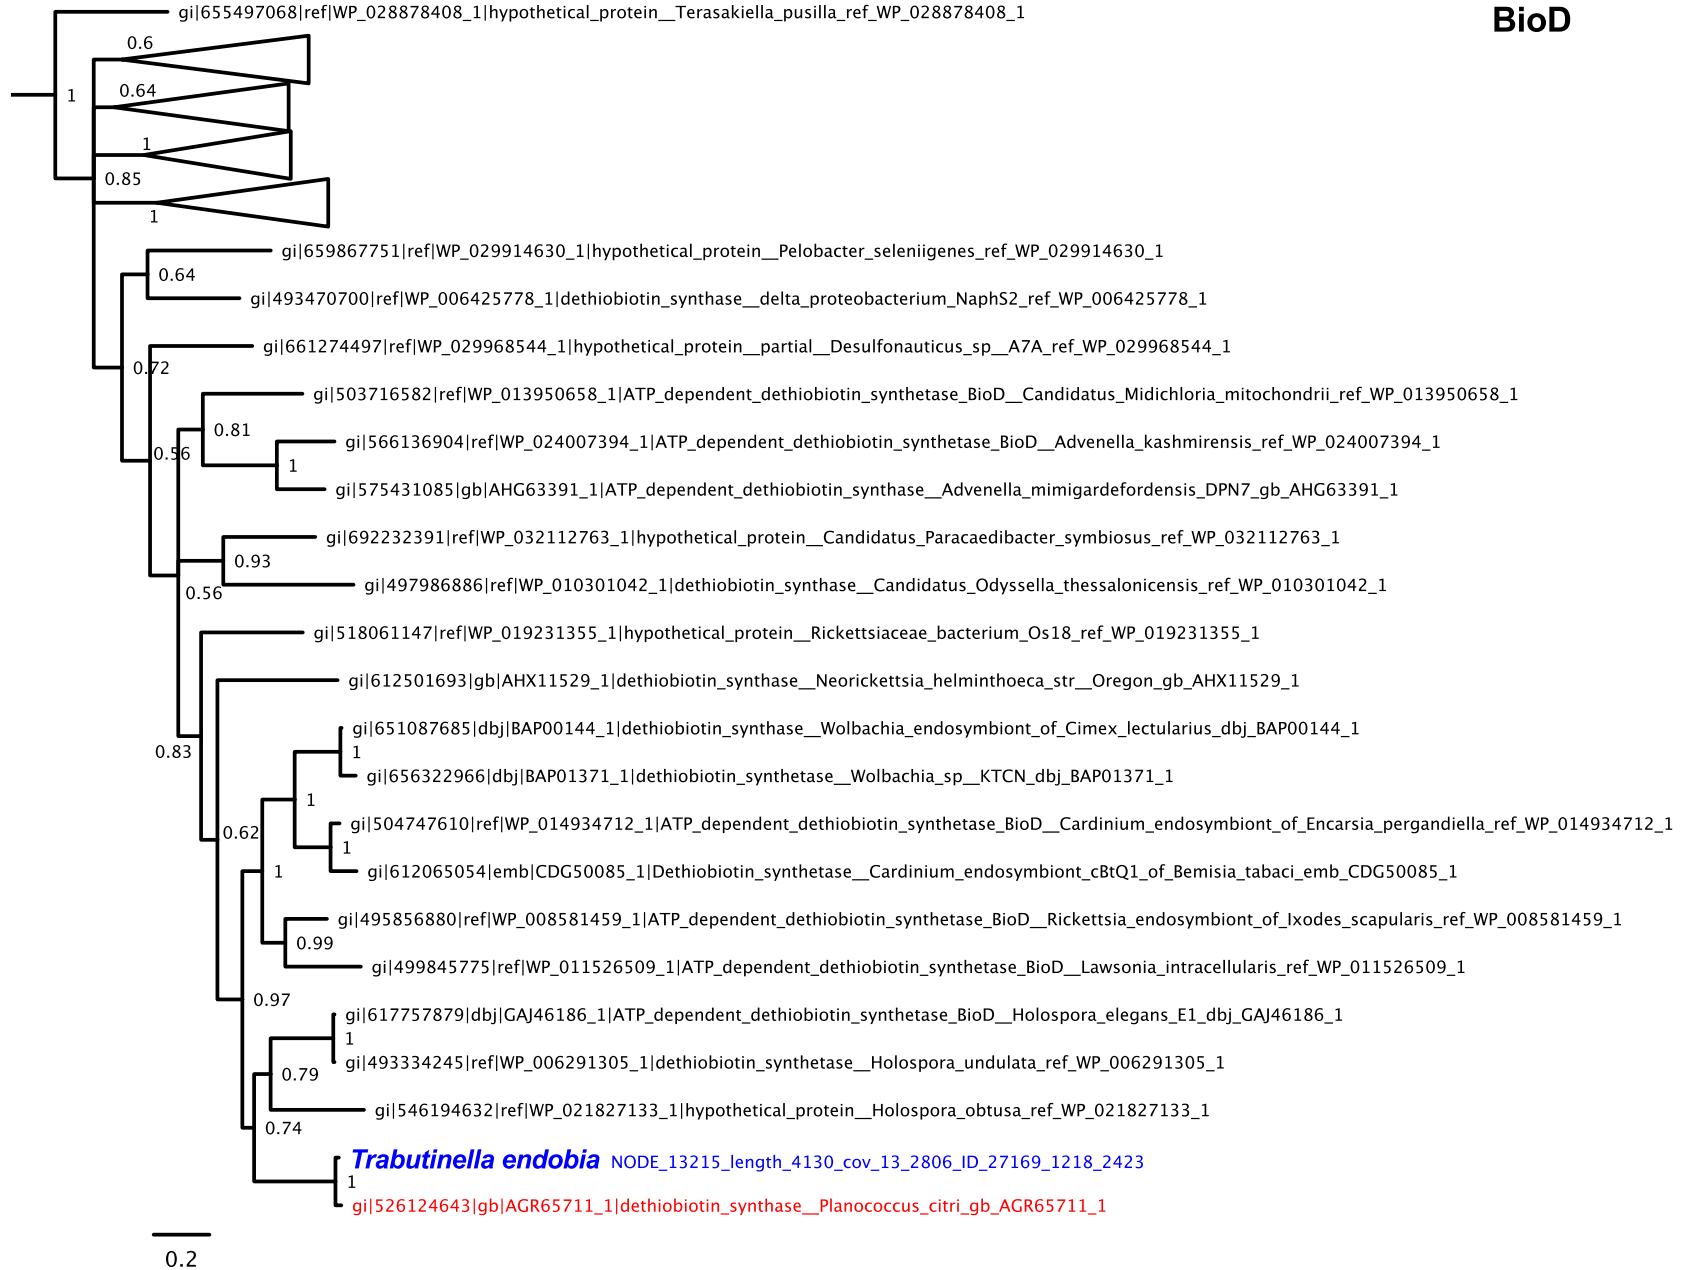

Figure S4H



# Tms1

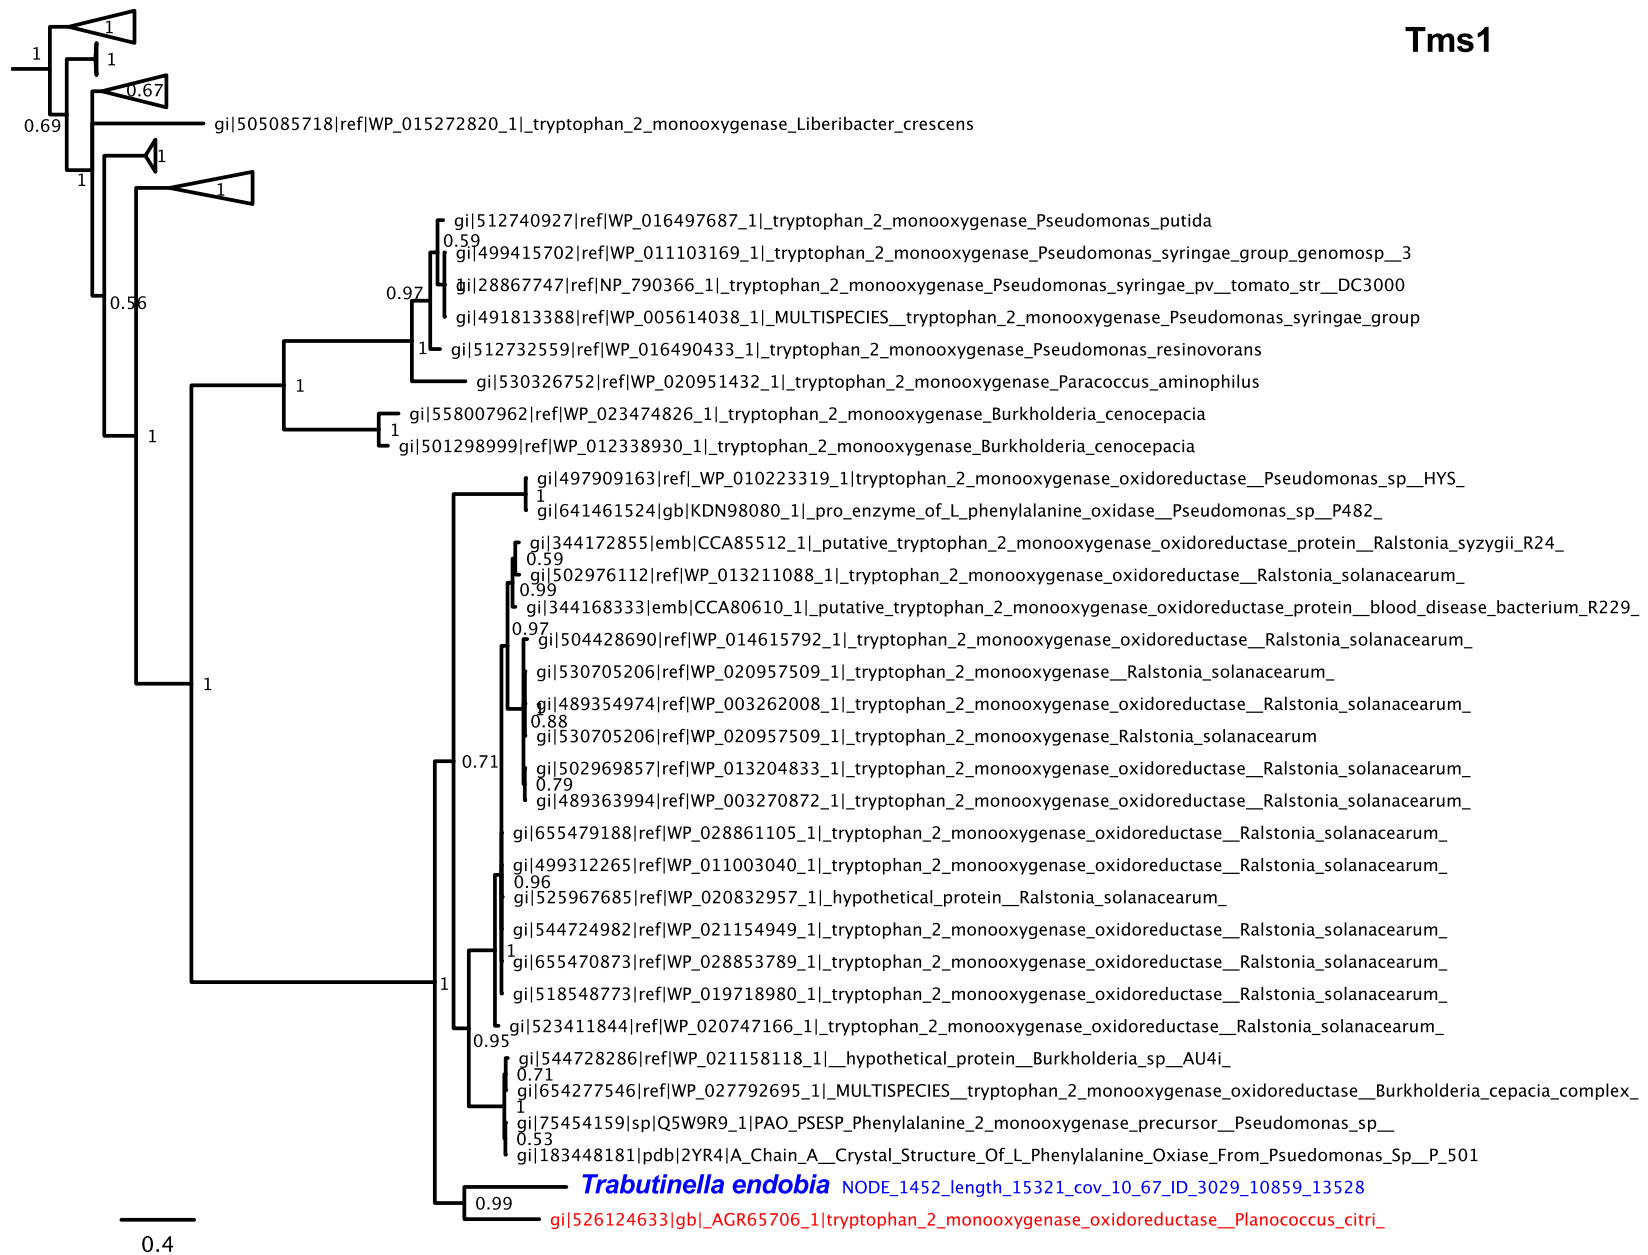

Figure S4I
